# Supplementary material for: Cytomegaloviruses in a Community of Wild Nonhuman Primates in Taï National Park, Côte D’Ivoire
Source: PubMed Central journal article supplement (PMC5795424; doi:10.3390/v10010011), 2017-12-29
Supplement: viruses-10-00011-s001.pdf [file viruses-10-00011-s001.pdf]

**Table S1.** Primers used for generic amplification of CMV UL55 and UL56 sequences.

| PCR   | Target Gene | Primer Name         | PCR Round | Primer sequence 5'-3'                        | Product Length <sup>c</sup> | Binding Site in AD169 Genome |
|-------|-------------|---------------------|-----------|----------------------------------------------|-----------------------------|------------------------------|
| PCR1  | UL55 (gB)   | 2743-s <sup>a</sup> | 1st       | CGCAAATCGCAGA(N/I <sup>b</sup> )KC(N/I)TGGTG | 320                         | 81997–81976                  |
|       |             | 2746-as             |           | TGGTTGCCCAACAG(N/I)ATYTCRTT                  |                             | 81679–81701                  |
|       |             | 2744-s              | 2nd       | TTCAAGGAACTCAGYAARAT(N/I)AAYCC               | 230                         | 81947–81922                  |
|       |             | 2745-as             |           | CGTTGTCCTC(N/I)CC(N/I)ARYTG(N/I)CC           |                             | 81698–81719                  |
| PCR 2 | UL56        | 3903-s              | 1st       | CCTGTCGCACAATGTGGACATG                       | 250                         | 84106–84085                  |
|       |             | 3903-as             |           | CAGCTGTTTTCCGAA(N/I)GTTTCRTTAT               |                             | 83857–83882                  |
|       |             | 3904-s              | 2nd       | TGGCCTACGCYTGAYAACG                          | 180                         | 84086–84066                  |
|       |             | 3904-as             |           | GCGAACGTGC(N/I)TCCACATCTCC                   |                             | 83908–83929                  |

<sup>a</sup> s = sense; as = antisense; <sup>b</sup> I = Inosine; <sup>c</sup> approximate length.

**Table S2.** Primers used for long-distance PCR amplification of CMV UL55/UL56 sequences.

| PCR             | Primer | PCR Round | Primer Sequence 5'-3'    | Target Virus                 |
|-----------------|--------|-----------|--------------------------|------------------------------|
| <b>LD PCR 1</b> | 7399s  | 1st       | ACCCTAGCGAGTGGATGGT      | CatyCMV1                     |
|                 | 7399as |           | CTCTGATCCACCTCCACRCACT   |                              |
|                 | 7400s  | 2nd       | CGAGTGGATGGTGGTCAAGT     |                              |
|                 | 7400as |           | TGATCCACCTCCACRCACTTAGC  |                              |
| <b>LD PCR 2</b> | 7399s  | 1st       | ACCCTAGCGAGTGGATGGT      | CatyCMV2                     |
|                 | 7401as |           | AGAATCTGTACAACACCACAGG   |                              |
|                 | 7402s  | 2nd       | TGTGTGGATCTCAACATGTTGC   |                              |
|                 | 7402as |           | TCCTTCACATGCATGTCACG     |                              |
| <b>LD PCR 3</b> | 7403s  | 1st       | GGTACACCCTAGCGAGTGGGA    | CcamCMV1, CcamCMV2, CdiaCMV1 |
|                 | 7403as |           | CCAGGTTACCCYTTYACAYGCA   |                              |
|                 | 7404s  | 2nd       | ACTGTATTGATCTSAACATGTTGC |                              |
|                 | 7404as |           | GGTTTGTCGTAGATGGCGGA     |                              |
| <b>LD PCR 4</b> | 7407s  | 1st       | ACGATCTGGTCAAGTGCGC      | PtroCMV1                     |
|                 | 7407as |           | AGCACGTCGCCCATGAAG       |                              |
|                 | 7408s  | 2nd       | CGAGTGGATGGTGGTCAAGT     |                              |
|                 | 7408as |           | ATGGGCTTGTCGTAGATGGC     |                              |
| <b>LD PCR 5</b> | 7409s  | 1st       | GGTGTACCCAGCGAGTG        | PtroCMV2                     |
|                 | 7409as |           | ACGCTGGTCTGGTTGATGTT     |                              |
|                 | 7410s  | 2nd       | CGAGTGGATGGTGGTCAAGT     |                              |
|                 | 7410as |           | GTTGATGTTGACCCAGCTGG     |                              |
